# Supplementary material for: Improving small-sample performance in portable LIBS analysis with transfer learning and synthetic data-driven CNN models
Source: Royal Society of Chemistry journal article supplement (doi:10.1039/d5ja00490j), 2026-01-01
Supplement: d5ja00490j1.pdf [file d5ja00490j1.pdf]

1 · 1D-CNN specific parameters

Table S1 Parameters of the 1D-CNN module

|                       | Detail parameters                                                              |
|-----------------------|--------------------------------------------------------------------------------|
| Input layer           | $2024 \times 1$                                                                |
| CNN module            | Numbers of layers: 3<br>Size of kernels: $3 \times 1$<br>Number of kernels: 64 |
| Pooling layer         | Max pooling<br>Pool size: $2 \times 1$                                         |
| Activation function   | ReLU                                                                           |
| FC layer              | 128                                                                            |
| Optimizer             | Adam optimizer                                                                 |
| Initial learning rate | $9E-5$                                                                         |
| Loss function         | MSE loss                                                                       |
| Epoch                 | 500                                                                            |
| Batch size            | 32                                                                             |
| Pruning strategy      | magnitude-based pruning                                                        |
| keep ratio            | 85%                                                                            |

2 · Results of the SHAP analysis, showing the top five features with the highest scores, along with their corresponding spectral lines identified based on the NIST public database.

Table S2 Representative wavelengths with high SHAP contributions and their corresponding spectral line assignments under laboratory-data-based and simulation-data-based transfer learning.

| Laboratory Data Transfer Learning |          |                    | Simulate Data Transfer Learning |          |                    |
|-----------------------------------|----------|--------------------|---------------------------------|----------|--------------------|
| Wavelength<br>(nm)                | SHAP     | Line<br>assignment | Wavelength<br>(nm)              | SHAP     | Line<br>assignment |
| 306.651                           | 0.064964 | Ni I               | 308.724                         | 0.035009 | Ni I               |
| 308.724                           | 0.053419 | Ni I               | 308.493                         | 0.029569 | Ni I               |
| 308.493                           | 0.052537 | Ni I               | 307.342                         | 0.028988 | Ni I               |
| 308.954                           | 0.049379 | Ni I               | 309.184                         | 0.021786 | Ni I               |
| 307.342                           | 0.047232 | Ni I               | 310.795                         | 0.018548 | Ni I               |
| 343.805                           | 0.048175 | Mo I               | 344.033                         | 0.062365 | Mo I               |
| 344.033                           | 0.040939 | Mo I               | 343.805                         | 0.044766 | Mo I               |
| 344.262                           | 0.028611 | Mo I               | 344.262                         | 0.043976 | Mo I               |
| 444.791                           | 0.025539 | Mo I               | 343.348                         | 0.032474 | Mo I               |

|         |          |       |         |          |       |
|---------|----------|-------|---------|----------|-------|
| 578.878 | 0.024646 | Mo I  | 396.888 | 0.025548 | Mo I  |
| 334.661 | 0.036402 | Ti II | 334.661 | 0.023718 | Ti II |
| 444.791 | 0.030545 | Ti II | 531.457 | 0.023612 |       |
| 458.549 | 0.021487 |       | 519.533 | 0.020457 | Ti I  |
| 444.124 | 0.020863 | Ti II | 322.515 | 0.016199 | Ti II |
| 333.975 | 0.020007 | Ti II | 343.805 | 0.013717 |       |

3 , This figure illustrates that, for the laboratory device, effective spectral data cannot be obtained in the region where the two spectral channels overlap.

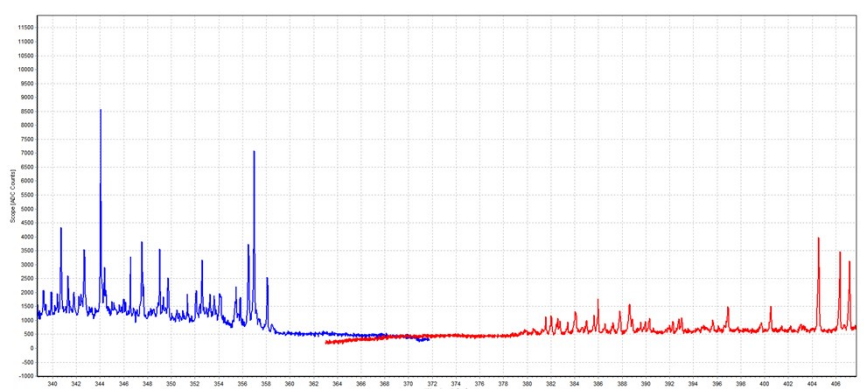

Fig S1 Sample spectrum acquired by the laboratory spectrometer, where blue and red curves correspond to channel 1 and channel 2.

4 , This figure presents the SHAP scores obtained under three different conditions: (i) the SHAP scores of the model trained using the full spectral range, (ii) the SHAP scores of the model trained after removing the spectral data in the 360–380 nm range, and (iii) the SHAP scores of the model trained after removing the spectral regions around the Fe-related spectral peaks. along with the corresponding table of regression coefficients.

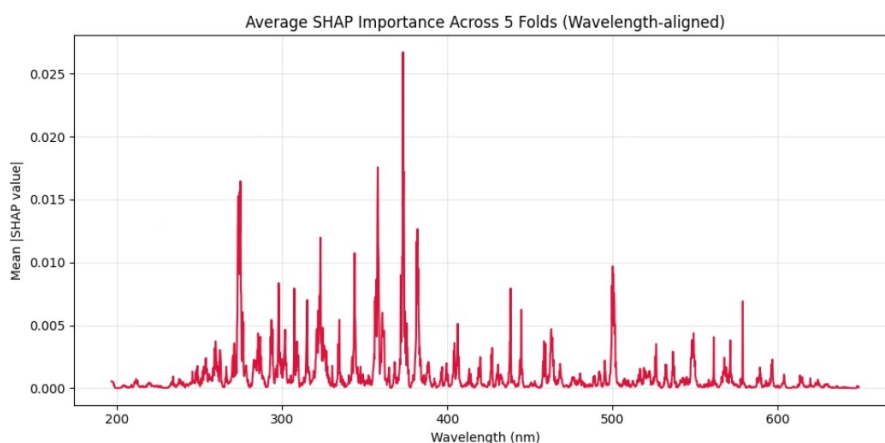

Fig S2 SHAP spectral contribution distributions for Ni

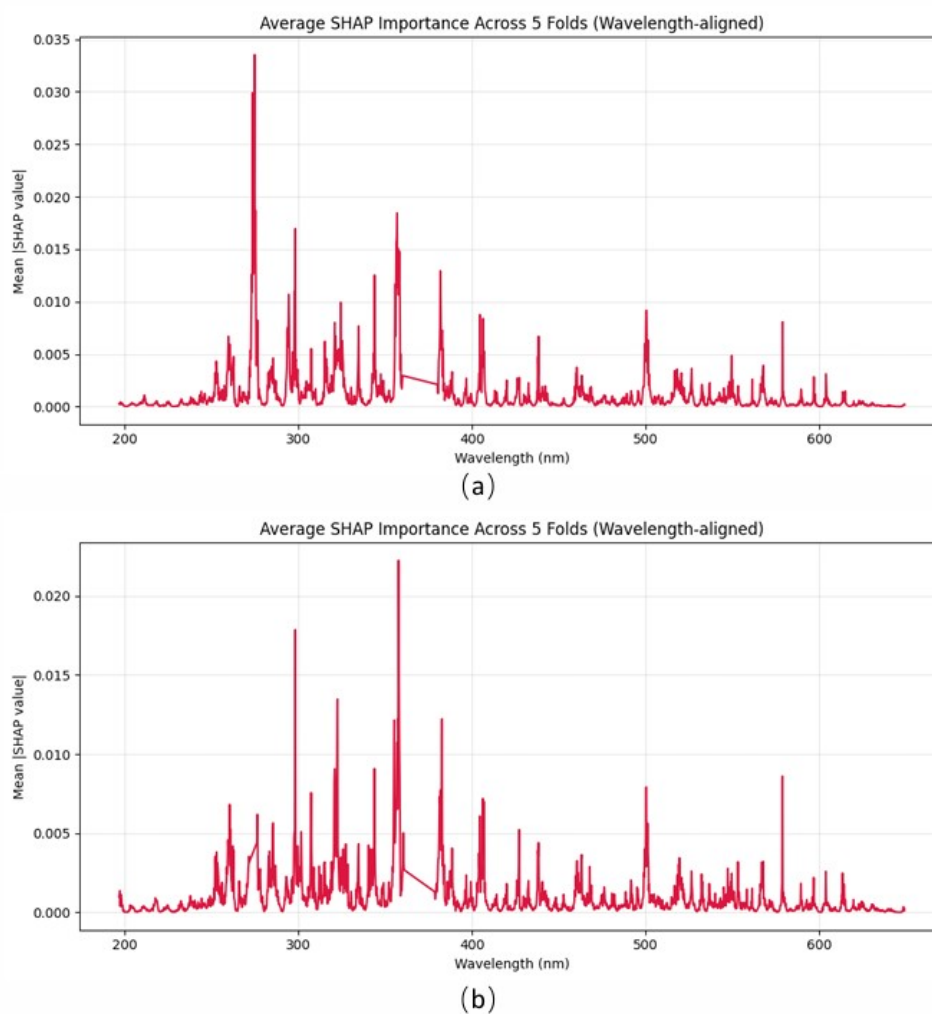

Fig S3 (a)-(b) SHAP spectral contribution distributions for Ni : (a) removing the 360–380 nm wavelength. (b) removing spectral regions associated with the Fe element.

Table S3 Comparison table of regression coefficients

| Methods       | $R_{cv}^2$ | $RMSE_{cv}$ (wt.%) |
|---------------|------------|--------------------|
| Full spectrum | 0.743      | 0.066              |
| Remove (i)    | 0.801      | 0.058              |
| Remove (ii)   | 0.819      | 0.052              |

5 , This figure shows the SHAP score results corresponding to the two transfer learning approaches.

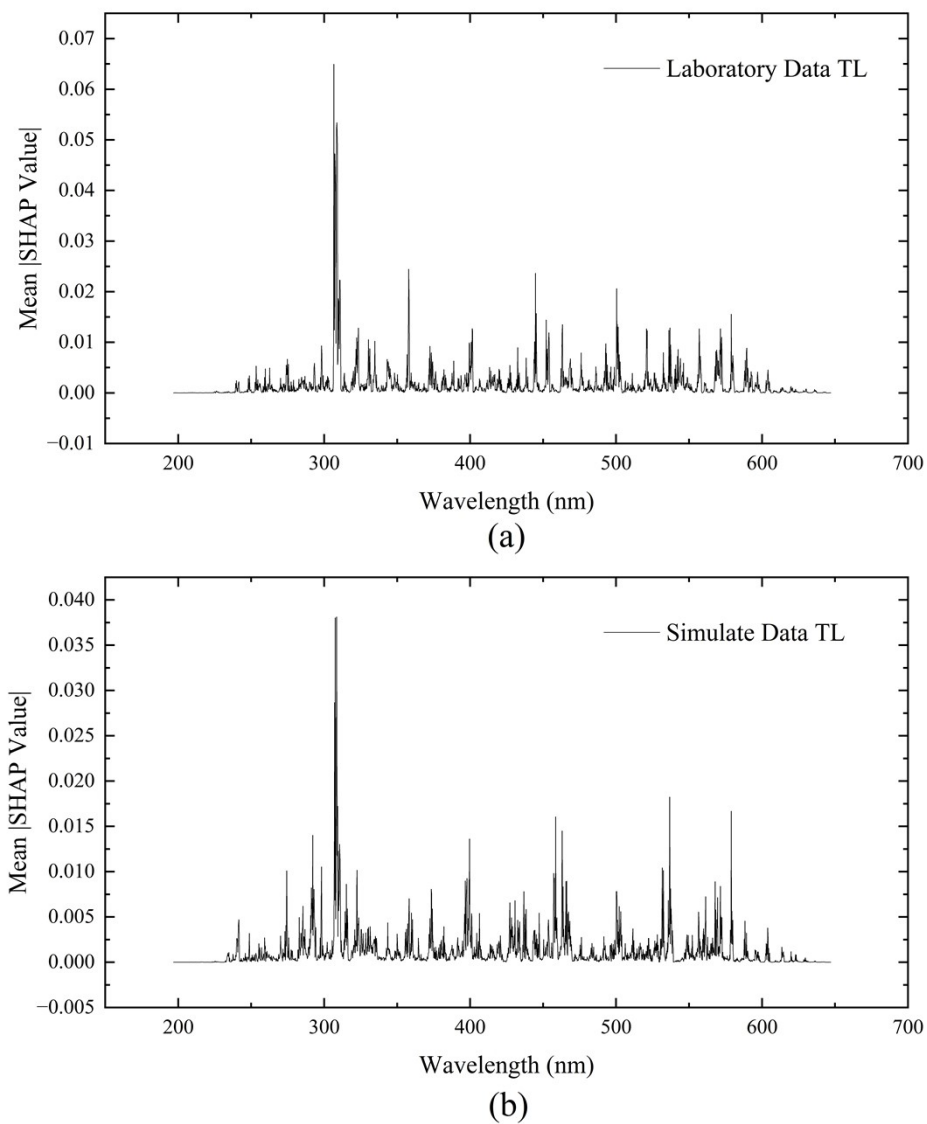

Fig S4 (a-b) SHAP Spectral Contributions for Ni (a) Laboratory Data Transfer Learning. (b) Simulate Data Transfer Learning
